# Supplementary material for: Multiple Phosphatidylinositol 3-Kinases Regulate Vaccinia Virus Morphogenesis
Source: PLoS One. 2010 May 28;5(5):e10884. doi: 10.1371/journal.pone.0010884 (PMC2878334; doi:10.1371/journal.pone.0010884)
Supplement: Table S1 — 20% inhibitory concentration (IC20) of PI3K inhibitors added post-adsorption to poxvirus-infected monolayers. 1[63] 2[113] 3[67] (0.03 MB DOC) [file pone.0010884.s001.doc]

Supplementary Table 1:

|  | **Inhibits:** | **Vaccinia IC20** | **Ectromelia IC20** | **Monkeypox IC20** | **Other Targets:** |
| --- | --- | --- | --- | --- | --- |
| **AS1** | p110-gamma | 16.32 ±1.9M | 6.87 ±1.5M | 4.56 ±4.7M | p110-alpha, p110-beta, p110-delta, PKCbII1 |
| **AS2** | p110-gamma | 21.79 ±3.1M | 27.00 ±3.4M | 3.58 ±1.4M | p110-alpha, p110-beta, p110-delta1 |
|  |  |  |  |  |  |
| **B0304** | p110-alpha | 4.00 ±0.3M | 3.25 ±0.2M | 0.8 ±0.6M | p110-beta, p110-delta, p110gamma2 |
| **LY294002** | Broad-Spectrum PI3K Inhibitor3 | 19.76 ±6.4M | 1.05 ±0.0M | 2.83 ±3.0M |  |
